# Supplementary material for: Ubiquitination of OsCSN5 by OsPUB45 activates immunity by modulating the OsCUL3a-OsNPR1 module
Source: PubMed Central journal article supplement — Sci Adv. 2025 Jan 3;11(1):eadr2441. doi: 10.1126/sciadv.adr2441 (PMC11698096; doi:10.1126/sciadv.adr2441), 2025-01-03
Supplement: sciadv.adr2441_sm.pdf [file sciadv.adr2441_sm.pdf]

Supplementary Materials for  
**Ubiquitination of OsCSN5 by OsPUB45 activates immunity by modulating  
the OsCUL3a-OsNPR1 module**

Chongyang Zhang *et al.*

Corresponding author: Ruyi Wang, wangrui@caas.cn; Yuese Ning, ningyuese@caas.cn

*Sci. Adv.* **11**, eadr2441 (2025)  
DOI: 10.1126/sciadv.adr2441

**This PDF file includes:**

Figs. S1 to S6  
Table S1

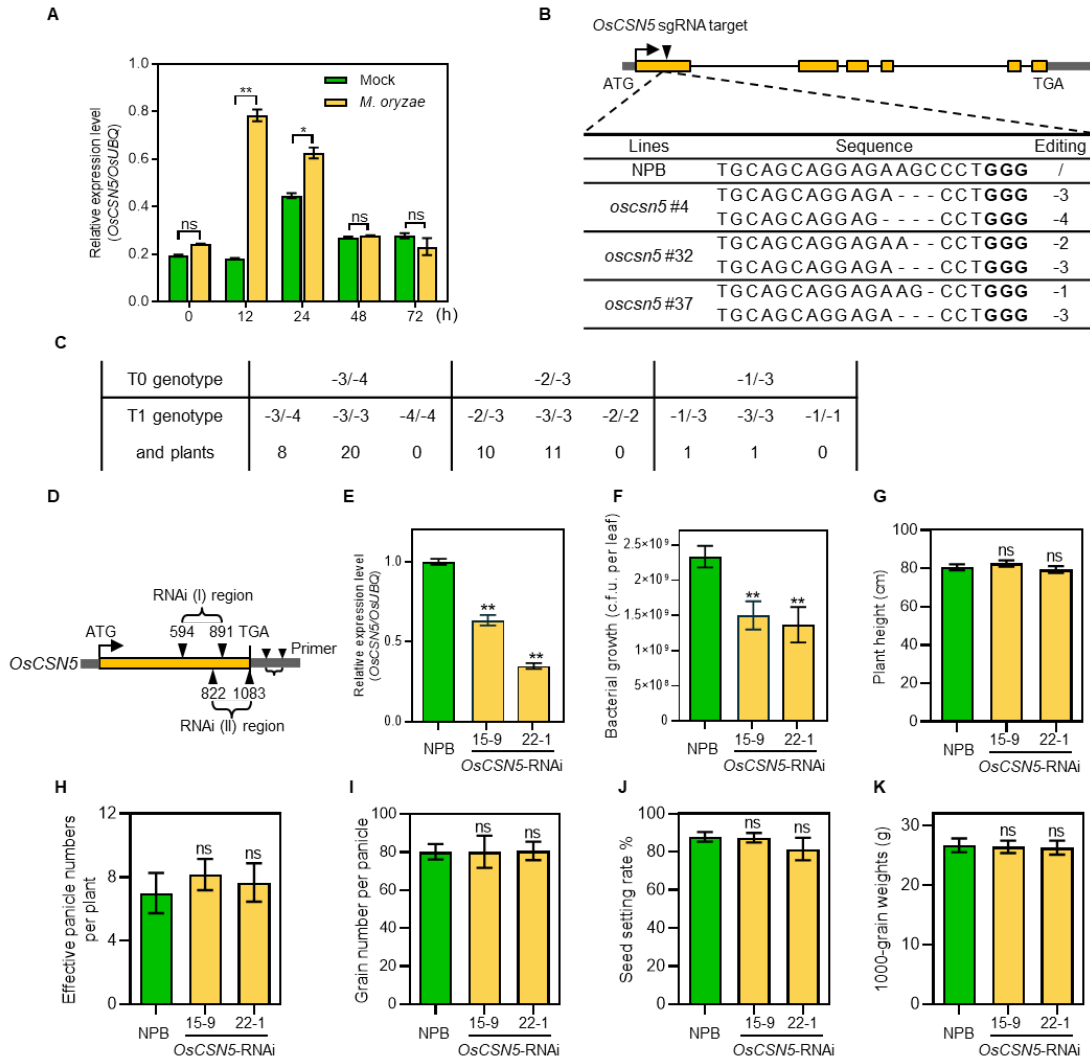

**Fig. S1. Expression patterns of *OsCSN5*, genotype of *oscsn5* mutant and major agronomic traits of *OsCSN5*-RNAi plants.**

(A) The expression of *OsCSN5* in NPB plants inoculated with the compatible *M. oryzae* isolate RB22, as determined by qRT-PCR. A mock-inoculation control was prepared using ddH<sub>2</sub>O containing 0.1% (v/v) Tween 20. The rice *UBIQUITIN* (*OsUBQ*) gene was used as the reference gene to normalize gene expression levels. Values are means  $\pm$  SD (n = 3, technical repeats).

(B) Diagram of mutations in *oscsn5* mutants generated by CRISPR/Cas9 technology. The yellow boxes represent exons and grey boxes represent untranslated regions (UTRs).

(C) Genotypes of *oscsn5* mutant plants in T1 generation.

(D) Diagram of the *OsCSN5*-silencing regions in *OsCSN5*-RNAi plants. The yellow boxes represent coding sequence (CDS) and grey boxes represent untranslated regions (UTRs).

(E) The expression of *OsCSN5* in *OsCSN5*-RNAi transgenic plants by qRT-PCR. *UBIQUITIN* (*OsUBQ*) was used as an internal control. Values are means  $\pm$  SD (n = 3, technical repeats).

(F) Bacterial growth as indicated by the numbers of colony-forming units (c.f.u.) per leaf for *OsCSN5*-RNAi and NPB plants (n = 3).

(G-K) Major agronomic traits measured in *OsCSN5*-RNAi plants: plant height (G), effective panicle numbers per plant (H), grain number per panicle (I), seed setting rate % (J), thousand-grain weights (K). For (G)-(K), values are means  $\pm$  SD (n = 6). 'ns' indicates no statistical significance at  $p > 0.05$  according to Student's t test.

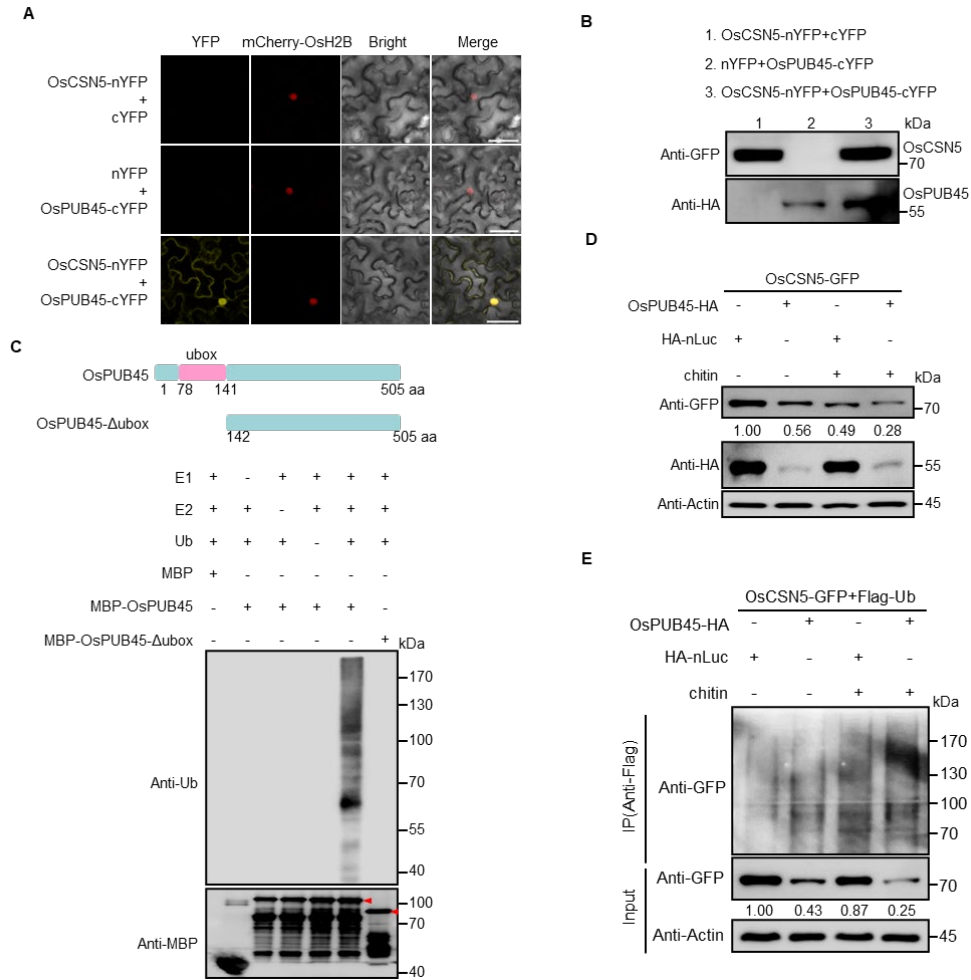

**Fig. S2. OsPUB45 displays E3 ligase activity and degrades OsCSN5 in rice protoplasts.**

(A) BiFC assay to confirm the interaction between OsCSN5 and OsPUB45 in *N. benthamiana*. Scale bars, 50  $\mu$ m. mCherry-OsH2B was co-expressed to indicate the nucleus.

(B) Detection of protein expression in BiFC assay shown in (A). Anti-GFP and anti-HA antibodies were used to detect OsCSN5-nYFP and OsPUB45-cYFP, respectively.

(C) E3 ubiquitin ligase activity of OsPUB45. E1, E2, Ub, and rice total extract preincubated MBP-OsPUB45 or MBP-OsPUB45- $\Delta$ ubox were incubated in the reactions. Ubiquitin-bound proteins were detected by immunoblot with anti-Ub and anti-MBP antibodies. Arrowheads indicate the target bands of MBP-OsPUB45 and MBP-OsPUB45- $\Delta$ ubox.

(D) Degradation of OsCSN5 by OsPUB45 in rice protoplasts with chitin treatment. Co-expressed OsCSN5-GFP with HA-nLuc or OsPUB45-HA in rice protoplasts with or without 80 nM chitin treatment for 1 h. Anti-GFP and anti-HA antibodies were used to check OsCSN5-GFP and OsPUB45-HA, respectively.

(E) Ubiquitination levels of OsCSN5 by OsPUB45 with chitin treatment. Flag-Ub was transiently co-expressed in rice protoplasts with OsCSN5-GFP and OsPUB45-HA or HA-nLuc with or without 80 nM chitin for 1 h. Total proteins were extracted and were then subject to immunoprecipitation with anti-Flag. The polyubiquitination of OsCSN5-GFP was detected by immunoblot with an anti-GFP antibody. The input proteins were probed with anti-GFP. Actin was served as an internal control.

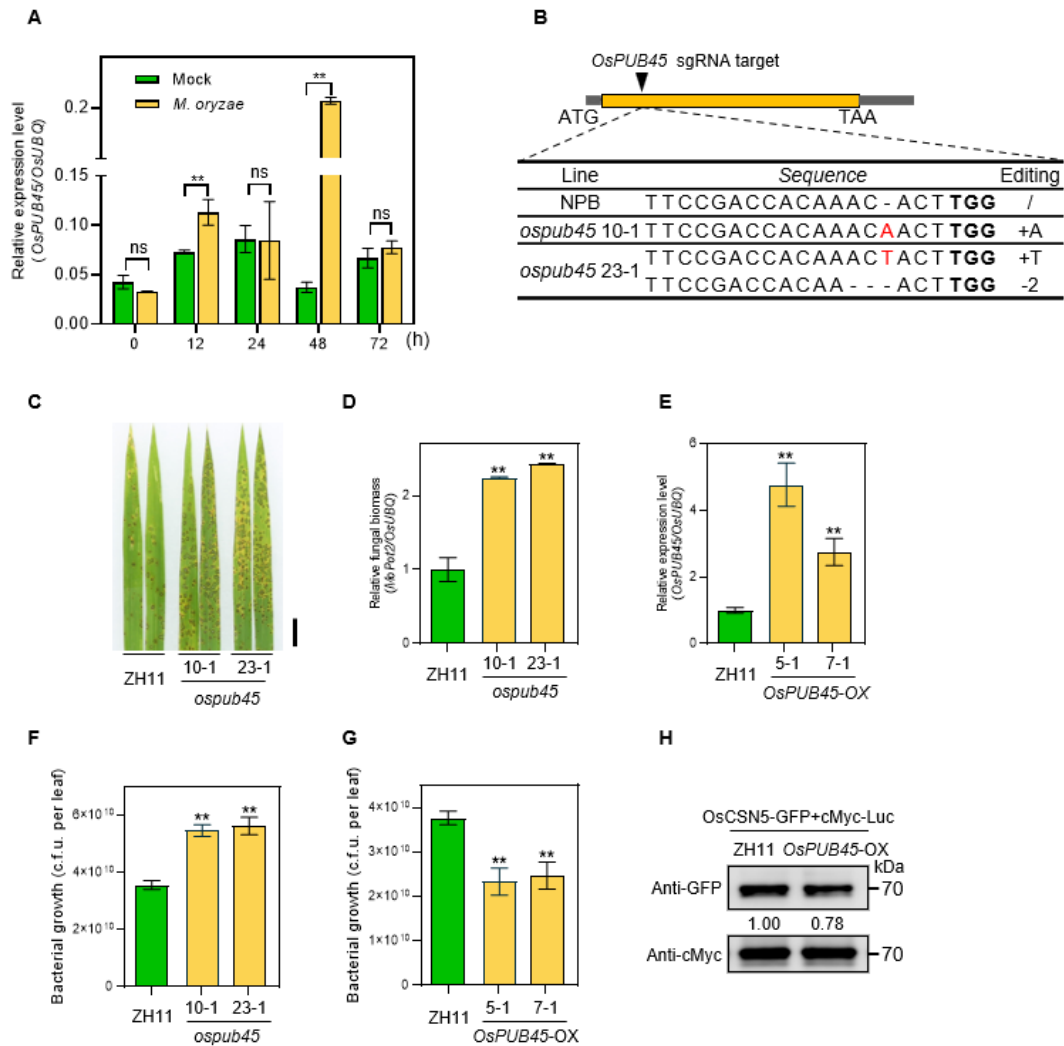

**Fig. S3. Expression patterns of *OsPUB45*, genotype and phenotype of *OsPUB45* transgenic plants.**

(A) The expression of *OsPUB45* in NPB plants inoculated with the compatible *M. oryzae* isolate RB22, as determined by qRT-PCR. A mock-inoculation control was prepared using ddH<sub>2</sub>O containing 0.1% (v/v) Tween 20. Values are means ± SD (n = 3, technical repeats).

(B) Diagram of the mutation types in *ospub45* mutant lines generated by CRISPR/Cas9 technology. The yellow boxes represent exons and grey boxes represent untranslated regions (UTRs).

(C and D) Disease symptoms (C) and relative fungal biomass (D) of representative leaves from *ospub45* mutants and ZH11 plants after spray inoculation with *M. oryzae* isolate RB22. Scale bar, 2 cm.

(E) Transcript levels of *OsPUB45* in *OsPUB45-OX* transgenic plants was measured by qRT-PCR.

(F) Bacterial growth as indicated by the numbers of colony-forming units (c.f.u.) per leaf for *ospub45* mutants and ZH11 plants (n = 3).

(G) Bacterial growth as indicated by the numbers of colony-forming units (c.f.u.) per leaf for *OsPUB45-OX* and ZH11 plants (n = 3).

(H) Detection of OsCSN5 protein levels in ZH11 and *OsPUB45-OX* protoplasts. OsCSN5-GFP and cMyc-Luc were transiently expressed in ZH11 and *OsPUB45-OX* rice protoplasts and OsCSN5-GFP was detected by immunoblotting using an anti-GFP antibody. cMyc-Luc served as loading control. The relative OsCSN5-GFP band intensities were quantified with ImageJ. Similar results were obtained from three independent biological experiments.

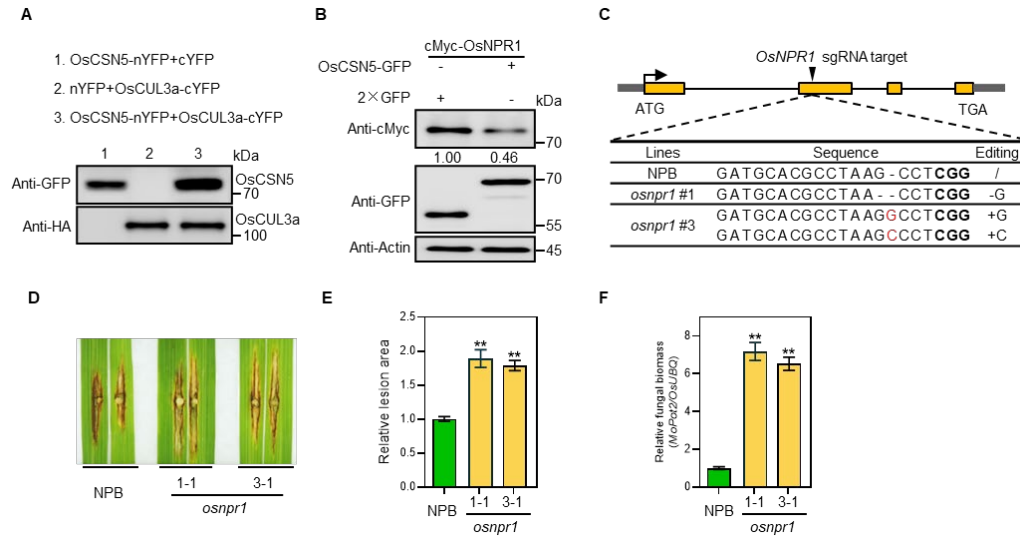

**Fig. S4. Mutation type and blast resistance analysis in *osnpr1* mutant plants.**

(A) Detection of protein expression in Fig. 4B. Anti-GFP and anti-HA antibodies were used to detect OsCSN5-nYFP and OsCUL3a-cYFP, respectively.

(B) OsCSN5 promotes the degradation of OsNPR1. *2×GFP* or *OsCSN5-GFP* and *cMyc-OsNPR1* plasmids were co-expressed in rice protoplasts. The relative cMyc-OsNPR1 band intensities were quantified with ImageJ. Actin serves as an internal control. Similar results were obtained from three independent biological experiments.

(C) Diagram of the mutation types in *osnpr1* mutants generated by CRISPR/Cas9 technology. The yellow boxes represent exons and grey boxes represent untranslated regions (UTRs).

(D-F) Disease symptoms (D), the relative leaf area with lesions, as measured by ImageJ (E), and relative fungal biomass (F) of representative leaves of *osnpr1* and NPB plants after punch inoculation with *M. oryzae* isolate RB22. Values are means ± SD (n = 3, technical repeats).



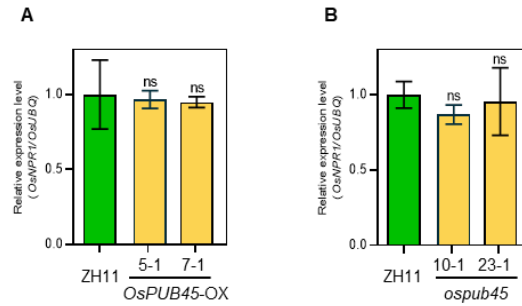

**Fig. S5. Transcript levels of *OsNPR1* in *OsPUB45-OX* and *ospb45* plants.**

(A) Relative transcript levels of *OsNPR1* in *OsPUB45-OX* and ZH11 plants as determined by qRT-PCR.

(B) Relative transcript levels of *OsNPR1* in *ospb45* mutants and ZH11 plants as determined by qRT-PCR.

Values are means  $\pm$  SD (n = 3, technical repeats). 'ns' indicates no statistical significance at  $p > 0.05$  according to Student's t test.

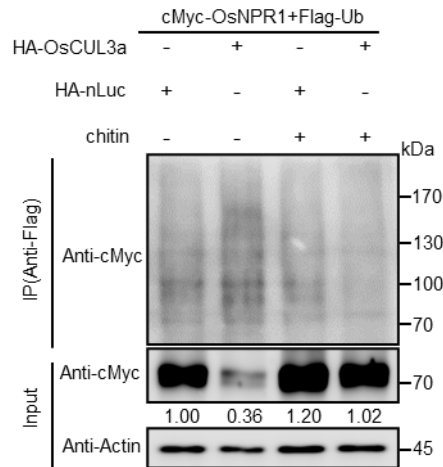

**Fig. S6. The ubiquitination and degradation analysis of OsNPR1 by OsCUL3a with chitin treatment.**

*In vivo* ubiquitination assay to show the ubiquitination levels and degradation of OsNPR1 after co-expression with OsCUL3a in rice protoplasts with chitin treatment. Flag-Ub was transiently co-expressed with cMyc-OsNPR1 and HA-OsCUL3a. Transfected protoplasts were treated with 80 nM chitin for 1 h. Total proteins were extracted and were then subject to immunoprecipitation with anti-Flag. The polyubiquitination of cMyc-OsNPR1 was detected by immunoblotting with an anti-cMyc antibody. Actin was served as an internal control.

**Supplemental Table 1. List of primers used in this study**

| <b>Primer Name</b>                                          | <b>Primer Sequence (5'-3')</b>               |
|-------------------------------------------------------------|----------------------------------------------|
| <b>Primers for vectors used for plant transformation</b>    |                                              |
| CRISPR- <i>OsPUB45</i> -F                                   | TGTTGCGTTCCGACCACAAACACT                     |
| CRISPR- <i>OsPUB45</i> -R                                   | AAACAGTGTGTTGTGGTCGGAACGC                    |
| CRISPR- <i>OsNPR1</i> -F                                    | TGTTGTTGATGCACGCCTAAGCCT                     |
| CRISPR- <i>OsNPR1</i> -R                                    | AAACAGGCTTAGGCGTGCATCAAC                     |
| CRISPR- <i>OsCSN5</i> -F                                    | TGTTGTCGTCCACGCCCGCGCCGG                     |
| CRISPR- <i>OsCSN5</i> -R                                    | AAACCCGGCGCGGGCGTGGACGAC                     |
| <i>OsPUB45</i> -OX-F                                        | TCCCCGGGTGAGCTCGGTACCATGGACCCCTCATCCTCCT     |
| <i>OsPUB45</i> -OX-R                                        | CACCATAGCGGCCGCACTAGTGAAAGGCATGATGTGGGTG     |
| <b>Primers for co-IP and degradation assay</b>              |                                              |
| <i>OsCSN5</i> -GFP-F                                        | TAGAACTAGTGGATCCATGGAGCCACCTCGTCG            |
| <i>OsCSN5</i> -GFP-R                                        | CCCCCTCGAGGTCGACTGCTTCAACCATAGGCTCAG         |
| <i>OsPUB45</i> -HA-F                                        | TAGAACTAGTGGATCCATGGACCCCTCATCCTCCT          |
| <i>OsPUB45</i> -HA-R                                        | CCCCCTCGAGGTCGACGAAAGGCATGATGTGGGTG          |
| <i>OsPUB45-ubox</i> HA-F                                    | GCTCTAGAACTAGTGGATCCATGGCCTCCACGGCCGCGC      |
| <i>OsPUB45-ubox</i> HA-R                                    | GGGCCCCCCTCGAGGTCGACGAAAGGCATGATGTGGGTG      |
| pRTVnHA- <i>OsCLU3a</i> -F                                  | GTTCCAGATTACGCTGGATCCATGAGCGGGGGCGGGC        |
| pRTVnHA- <i>OsCLU3a</i> -R                                  | TCACTTAGCGGCCGCACTAGTCTATGCAAGATAGCGATATAAC  |
| pRTVcMyc- <i>OsNPR1</i> -F                                  | GAGGACTTGAATTCGGGATCCATGGAGCCGCCGACCAG       |
| pRTVcMyc- <i>OsNPR1</i> -R                                  | TCACTTAGCGGCCGCACTAGTTCATCTCCTTGGTTCGAATGG   |
| <b>Primers for yeast two hybrid assay</b>                   |                                              |
| pGBKT7- <i>OsCSN5</i> -F                                    | ATGGCCATGGAGGCCGAATTCATGGAGCCACCTCGTCG       |
| pGBKT7- <i>OsCSN5</i> -R                                    | TGCGGCCGCTGCAGGTCGACTCATGCTTCAACCATAGGC      |
| <b>Primers for BiFC assay</b>                               |                                              |
| p2YN- <i>OsCSN5</i> -F                                      | CATTTACGAACGATAGTTAATTAATGGAGCCACCTCGTCG     |
| p2YN- <i>OsCSN5</i> -R                                      | CACTGCCACCTCCTCCACTAGTTGCTTCAACCATAGGCTCAG   |
| p2YC- <i>OsPUB45</i> -F                                     | CATTTACGAACGATAGTTAATTAATGGACCCCTCATCCTCCT   |
| p2YC- <i>OsPUB45</i> -R                                     | CACTGCCACCTCCTCCACTAGTGAAAGGCATGATGTGGGTG    |
| p2YC- <i>OsCLU3a</i> -F                                     | CATTTACGAACGATAGTTAATTAATGAGCGGGGGCGGGC      |
| p2YC- <i>OsCLU3a</i> -R                                     | CACTGCCACCTCCTCCACTAGTTGCAAGATAGCGATATAACTTC |
| <b>Primers for qRT-PCR and Fungal biomass determination</b> |                                              |
| <i>OsPAL1</i> -qF                                           | TGAATAACAGTGGAGTGTGGAG                       |
| <i>OsPAL1</i> -qR                                           | AACCTGCCACTCGTACCAAG                         |
| <i>OsPR10</i> -qF                                           | CCCTGCCGAATACGCCTAA                          |
| <i>OsPR10</i> -qR                                           | CTCAAACGCCACGAGAATTTG                        |
| <i>OsPUB45</i> -qF                                          | ATGGACCCCTCATCCTCCTC                         |
| <i>OsPUB45</i> -qR                                          | GGTGTGCAACAATGGCGAT                          |
| <i>OsCSN5</i> -qF                                           | CCTTTTGTGATGCTGGATTCA                        |

---

|                   |                          |
|-------------------|--------------------------|
| <i>OsCSN5</i> -qR | TTGACGATAAAACGCAGCTAAC   |
| <i>OsUBQ</i> -qF  | CGCAAGAAGAAGTGTGGTCA     |
| <i>OsUBQ</i> -qR  | GGGAGATAACAACGGAAGCA     |
| <i>MoPot2</i> -qF | ACGACCCGTCTTTACTTATTTGG  |
| <i>MoPot2</i> -qR | AAGTAGCGTTGGTTTTGTTGGAT  |
| <i>OsgUBQ</i> -qF | TTCTGGTCCTTCCACTTTCAG    |
| <i>OsgUBQ</i> -qR | ACGATTGATTTAACCAGTCCATGA |

**Primers for RT-PCR**

|                  |                        |
|------------------|------------------------|
| <i>OsCSN5</i> -F | GGTCTCATGTCACAGGTCATTA |
| <i>OsCSN5</i> -R | TGAATCCAGCATCAACAAAAGG |
| <i>OsNPR1</i> -F | GAGCCCTTGACTCTGACGAT   |
| <i>OsNPR1</i> -R | CCTCGCAGCAATGTGAAGAA   |

**Primers for ubiquitination assay**

|                                  |                                          |
|----------------------------------|------------------------------------------|
| pGEX-6P-1- <i>OsCSN5</i> -F      | TTCCAGGGGCCCCTGGGATCCATGGAGCCCACCTCGTCG  |
| pGEX-6P-1- <i>OsCSN5</i> -R      | ATGCGGCCGCTCGAGTCGACTCATGCTTCAACCATAGGC  |
| pMAL-c2X- <i>OsPUB45</i> -F      | ATTCAGAATTCGGATCCATGGACCCCTCATCCTCCTC    |
| pMAL-c2X- <i>OsPUB45Δubox</i> -F | ATTCAGAATTCGGATCCATGGCCTCCACGGCCGCGC     |
| pMAL-c2X- <i>OsPUB45Δubox</i> -R | GCTTGCCTGCAGGTCGAC TTAGAAAGGCATGATGTGGGT |

**Primers for Genotyping knockout plants**

|                                    |                       |
|------------------------------------|-----------------------|
| Genotype-CRISPR- <i>OsPUB45</i> -F | GAAAAGGCCACCACTGCCTA  |
| Genotype-CRISPR- <i>OsPUB45</i> -R | CGGAAGAACGTGGGTACCTT  |
| Genotype-CRISPR- <i>OsNPR1</i> -F  | ATTGCTAGCCCAATGCATGTC |
| Genotype-CRISPR- <i>OsNPR1</i> -R  | CCTCGTAGACTCTCACCTGC  |
| Genotype-CRISPR- <i>OsCSN5</i> -F  | TGGGAGCTGGAGAACAACATC |
| Genotype-CRISPR- <i>OsCSN5</i> -R  | GGCAGGGAAAGCAGATAACG  |

---
